# Supplementary material
Source: PubMed Central journal article supplement (PMC7872723)
Supplement: NIHMS1665100-supplement-suppl_info.pdf [file NIHMS1665100-supplement-suppl_info.pdf]

## **Supplementary Information**

Conformational dynamics of deubiquitinase A and the functional implications

Ashish Kabra and Ying Li\*

Department of Chemistry, University of Louisville, Louisville, KY 40208

E-mail: [ying.li.1@louisville.edu](mailto:ying.li.1@louisville.edu)

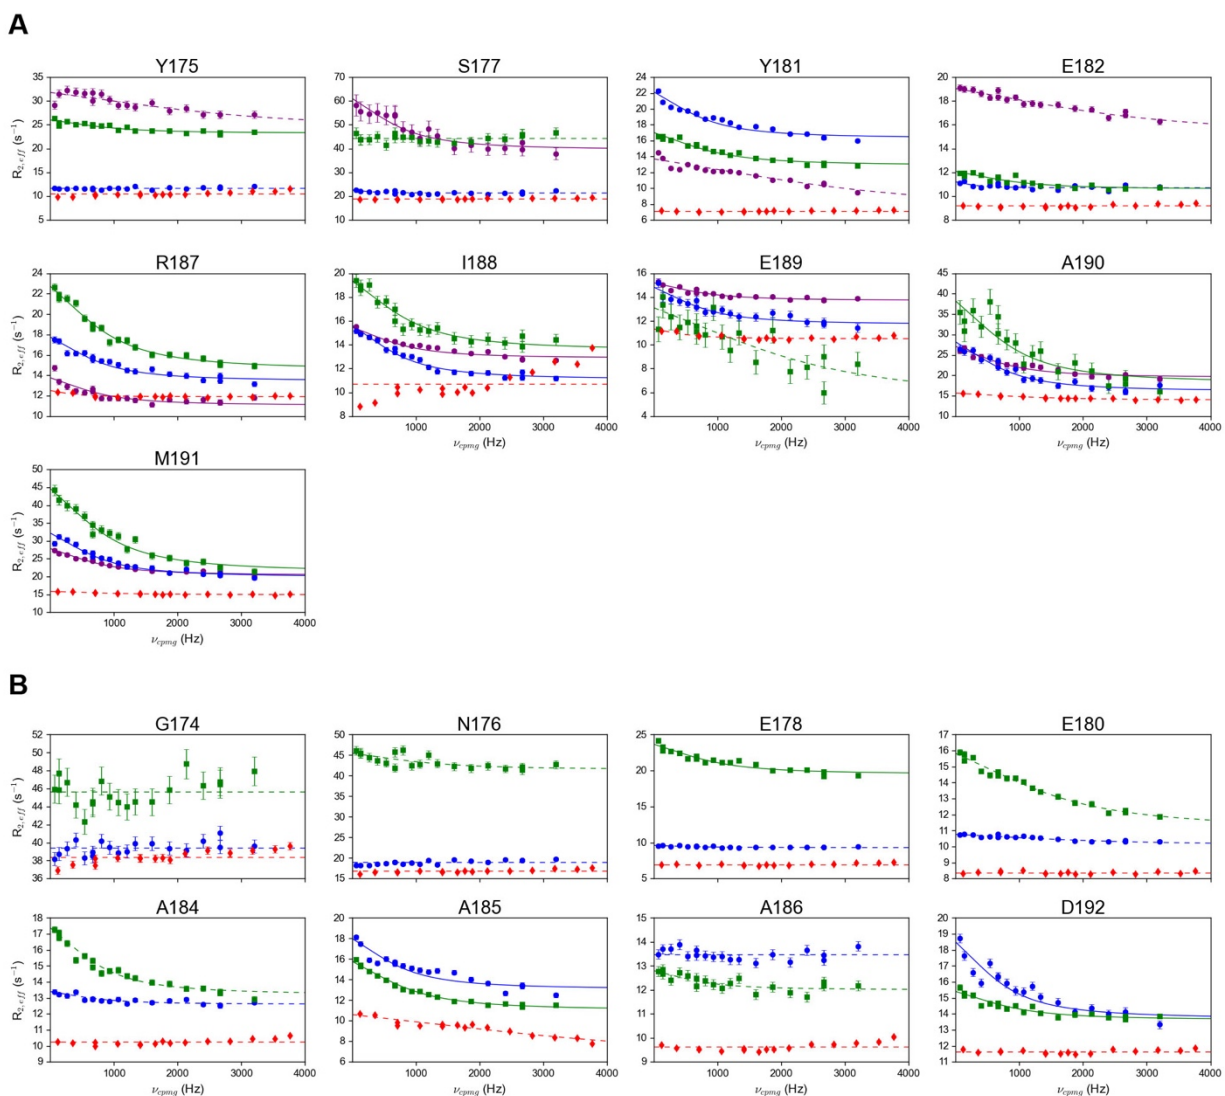

**Figure S1.** The amide  $^1\text{H}$  relaxation dispersion profiles of all assigned residues N-terminal to the  $\alpha_2$  helix (residues 174-192) in wild-type p-DUBA (purple circle for **a** conformer; blue circle for **b** conformer or the only conformer), wild-type np-DUBA (green square), and p-R272E/K273E mutant (red diamond). Residues showing two conformers are displayed in panel A and residues showing only one conformer are displayed in panel B. The dashed lines indicate individual fits and the solid lines indicate group fits. Residues that display less than 35% uncertainty in  $k_{\text{ex}}$  in individual fitting and satisfy  $\chi^2_{\text{group}}/\chi^2_{\text{individual}} < 2.0$  were group fit. The data were acquired at 298 K and 700 MHz  $^1\text{H}$  frequency.

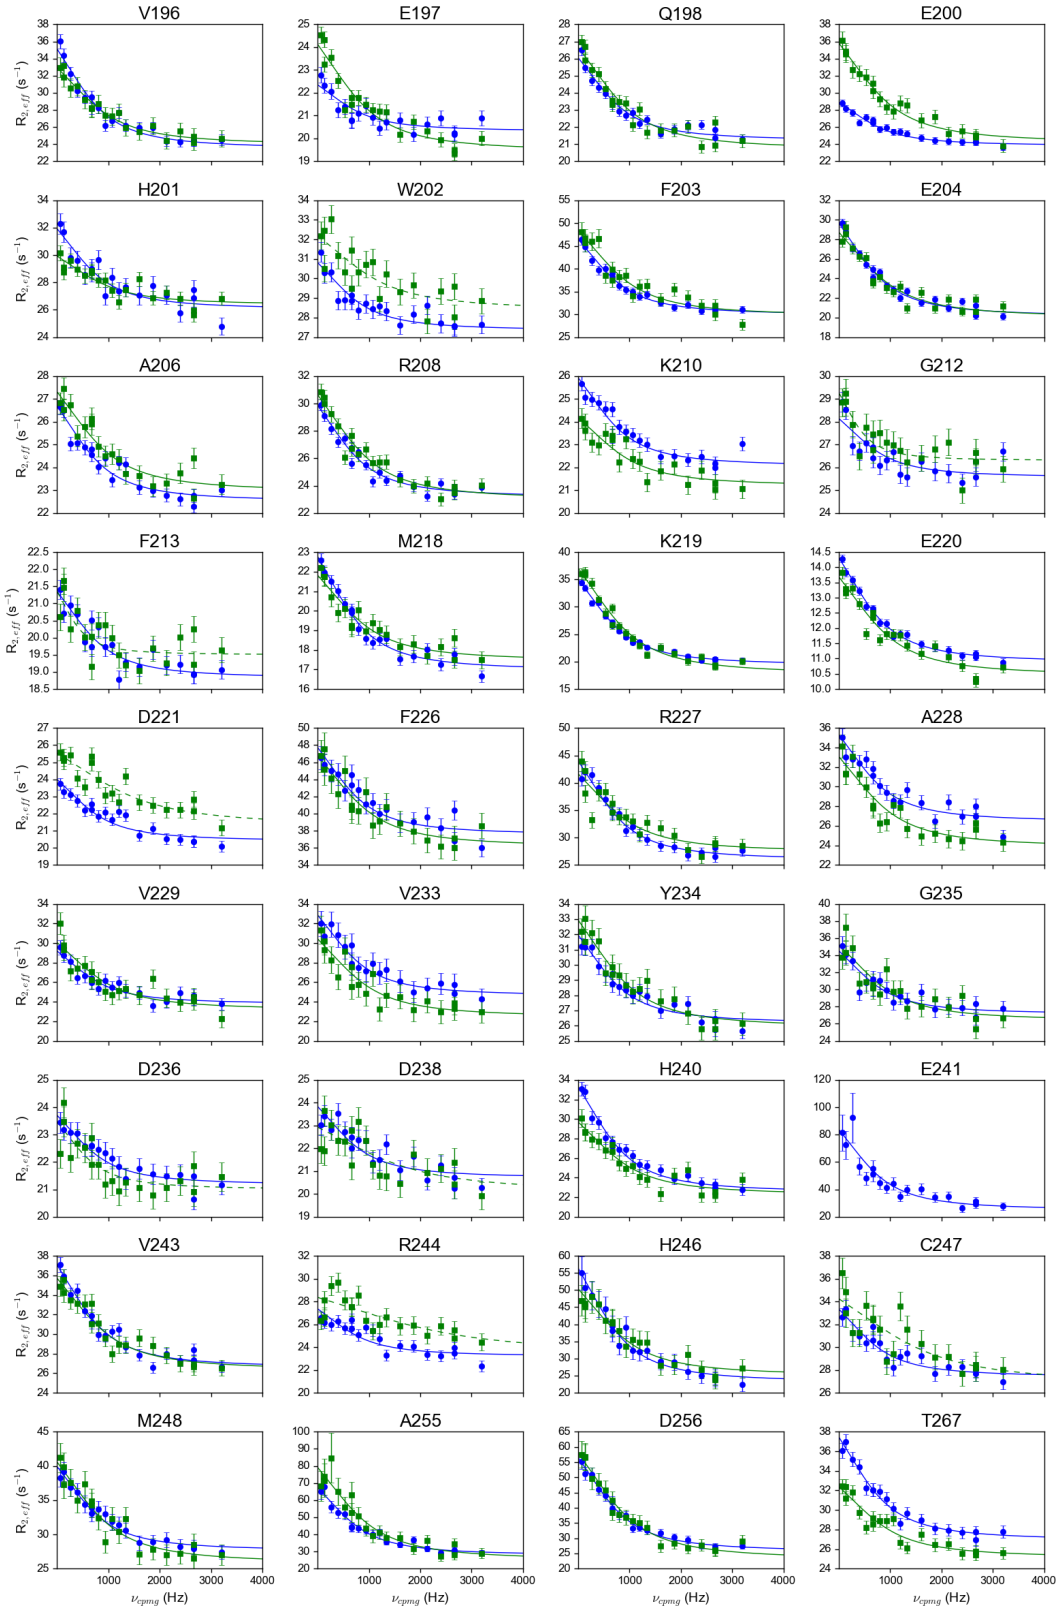

(figure continued on the next page)

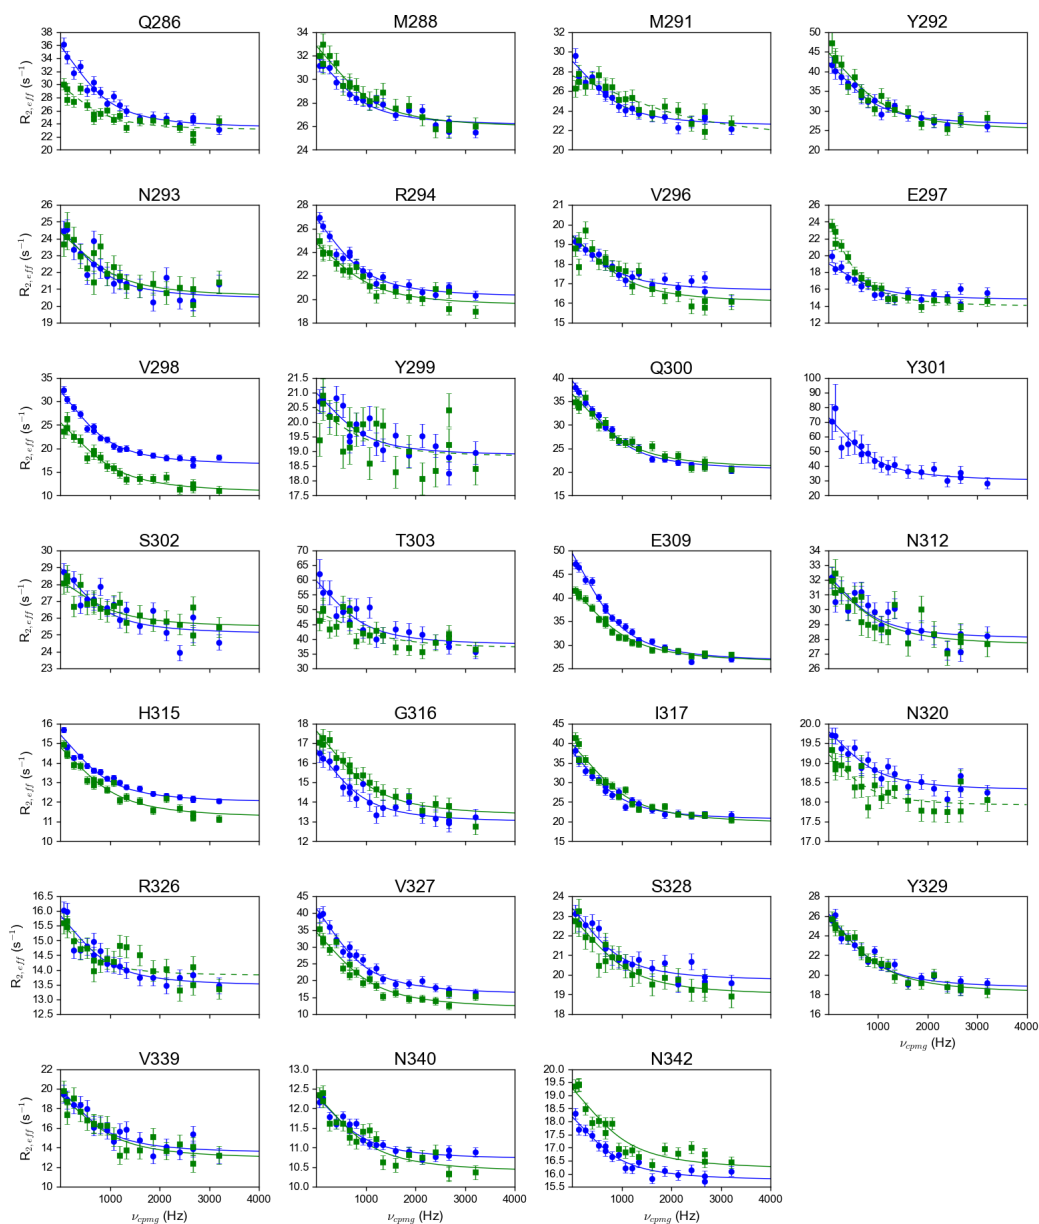

**Figure S2.** The amide  $^1\text{H}$  relaxation dispersion profiles of wild-type p-DUBA (blue) and np-DUBA (green). Only residues C-terminal to the  $\alpha 1$ - $\alpha 2$  loop and were group fit in p-DUBA are displayed. The solid lines indicate group fits and the dashed lines indicate individual fits. Residues that display less than 35% uncertainty in  $k_{\text{ex}}$  in individual fitting and satisfy  $\chi^2_{\text{group}}/\chi^2_{\text{individual}} < 2.0$  were group fit. Other residues were fit individually. The data were acquired at 298 K and 700 MHz  $^1\text{H}$  frequency.

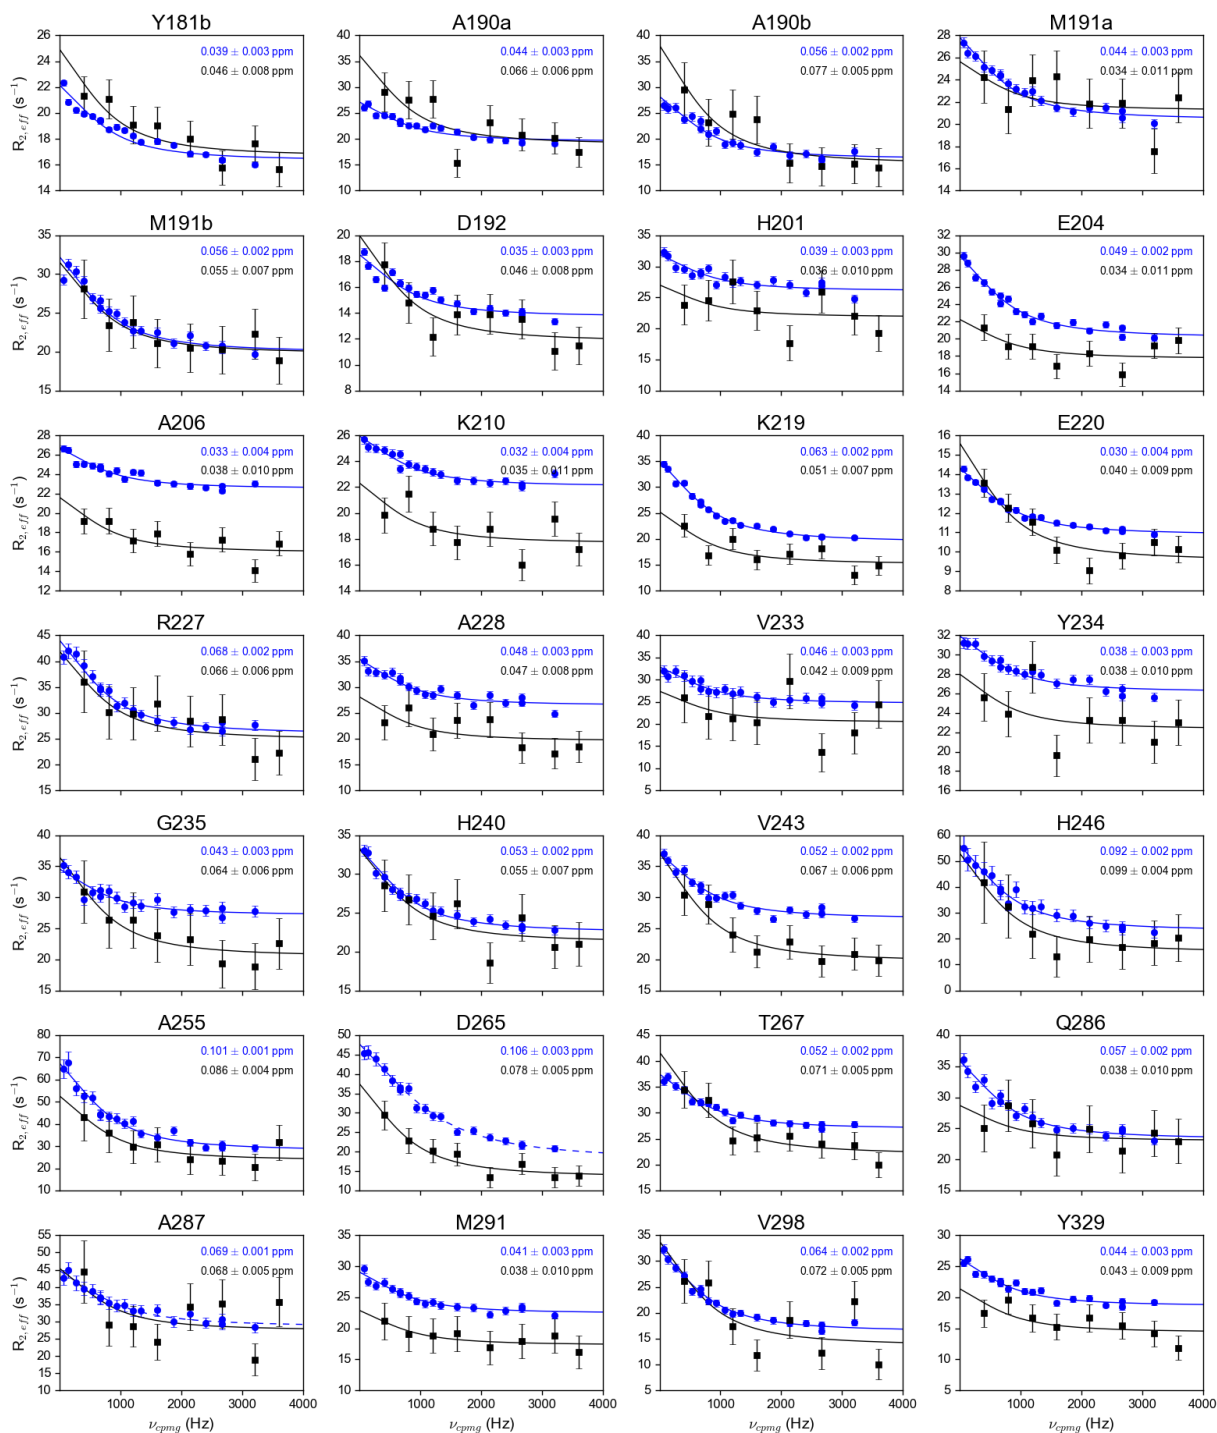

**Figure S3.** Representative amide  $^1\text{H}$  relaxation dispersion profiles of wild-type p-DUBA measured at  $580\ \mu\text{M}$  (blue) and  $100\ \mu\text{M}$  (black) protein concentrations. The data on the low concentration sample was fit with  $k_{ex}$  set to  $4954\ \text{s}^{-1}$ , which is the rate constant determined from the high concentration sample; other parameters were unconstrained. The solid lines indicate group fits and the dashed lines indicate individual fits. The  $\phi_{ex}^{1/2}$  values for both samples are displayed in each panel.

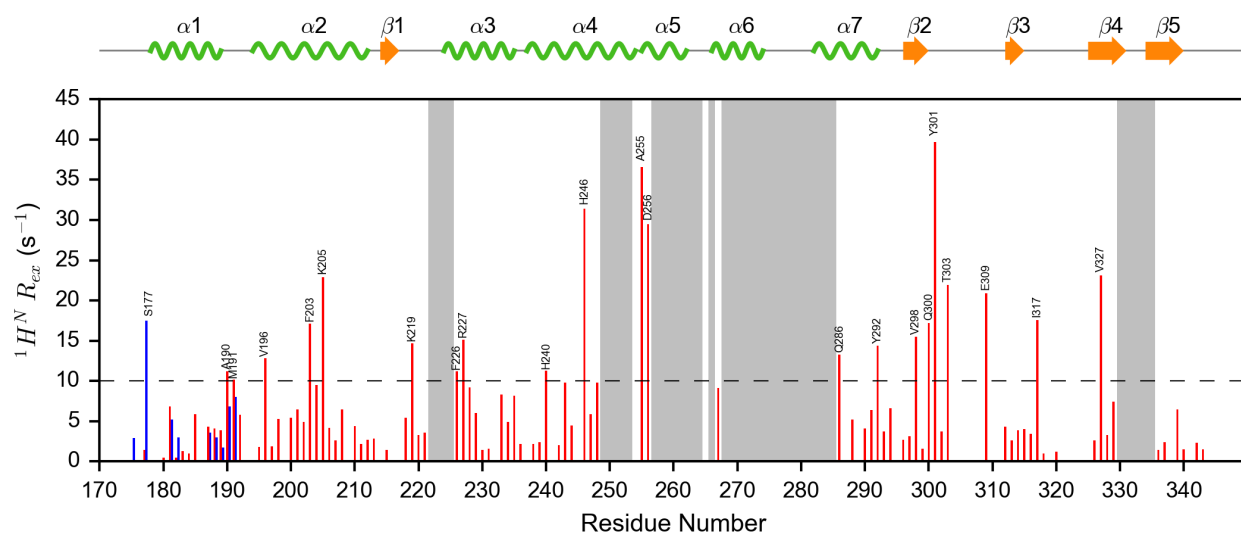

**Figure S4.**  $R_{ex}$  of 101 residues showing conformational exchange in p-DUBA.  $R_{ex}$  was estimated from the differences in  $R_{2,eff}$  at  $\nu_{cpmg} = 66.7$  Hz and 3200 Hz. The blue bars represent the **a** conformer; the red bars represent the **b** conformer or the only conformer. The dashed line indicates  $10 \text{ s}^{-1}$ . For residues with  $R_{ex} > 10 \text{ s}^{-1}$ , the residue names and numbers are displayed above the bars. The regions shaded in grey represent non-proline residues without detectable NMR signals. The secondary structure derived from the crystal structure of DUBA (PDB code: 3TMP) is displayed above the plot. The data were acquired at 298 K and 700 MHz  $^1\text{H}$  frequency.

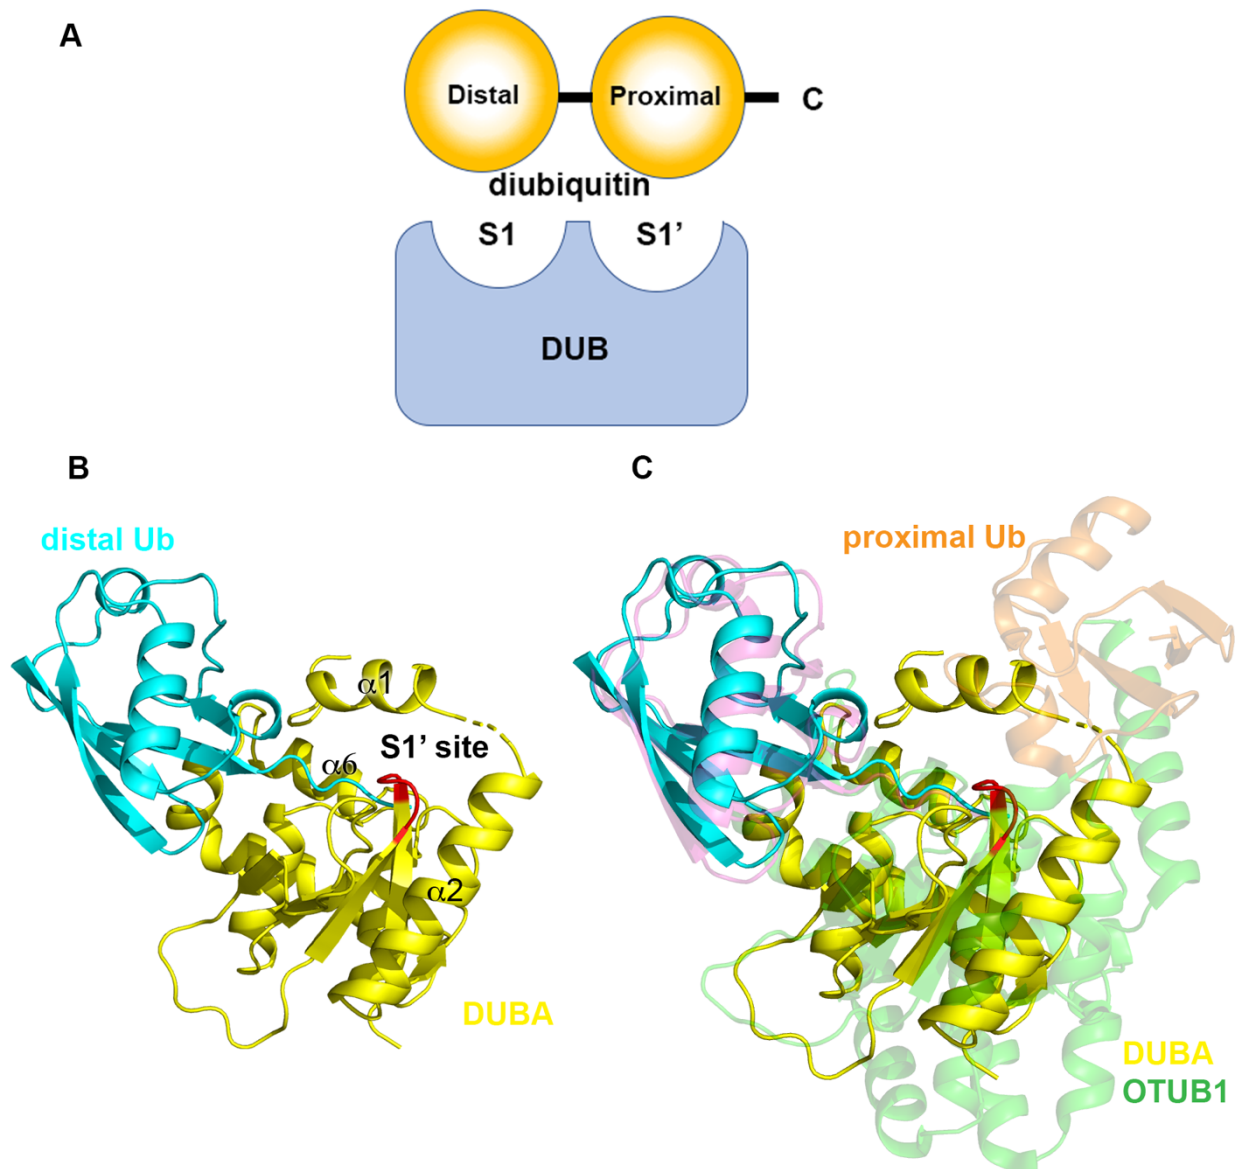

**Figure S5.** (A) Nomenclature used to identify binding sites on DUBs and to name the ubiquitin unit within the diubiquitin molecule. (B) The crystal structure of DUBA conjugated to the ubiquitin(Ub) aldehyde (PDB code: 3TMP) with the S1' site deduced from the crystal structure of h/ceOTUB1-Ub aldehyde-UBC13~Ub (PDB code: 4DHZ).<sup>1</sup> The His loop is highlighted in red. (C) The crystal structure of h/ceOTUB1 (PDB code: 4DHZ) with the bound distal and proximal ubiquitins superimposed to the crystal structure of DUBA (PDB code: 3TMP).

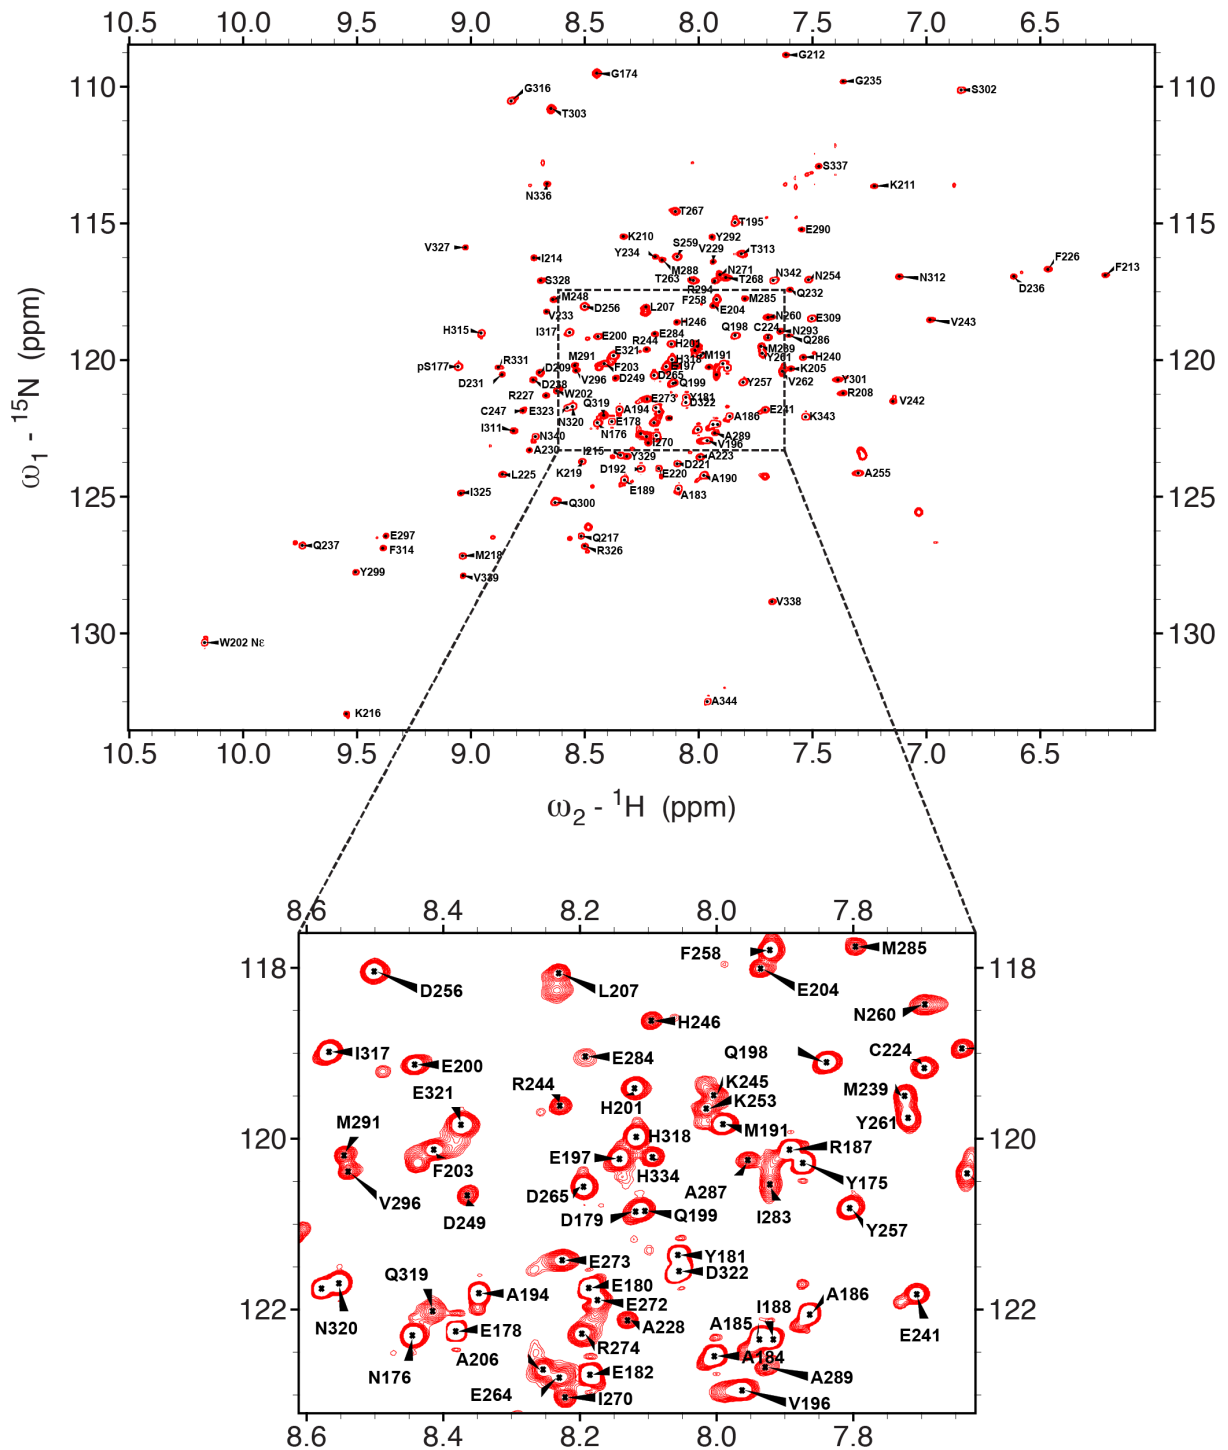

**Figure S6.**  $^{15}\text{N}$  TROSY spectrum of p-R272E/K273E mutant with assignments labeled. The data were acquired at 300 K and 700 MHz  $^1\text{H}$  frequency.



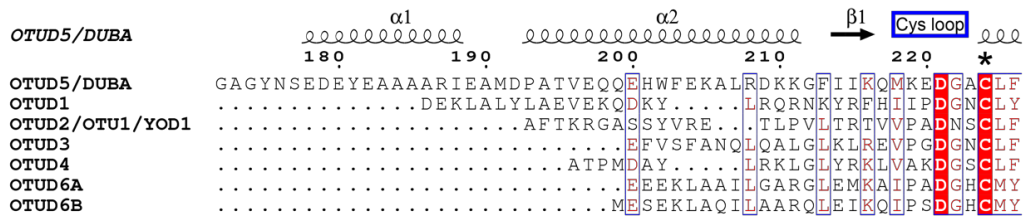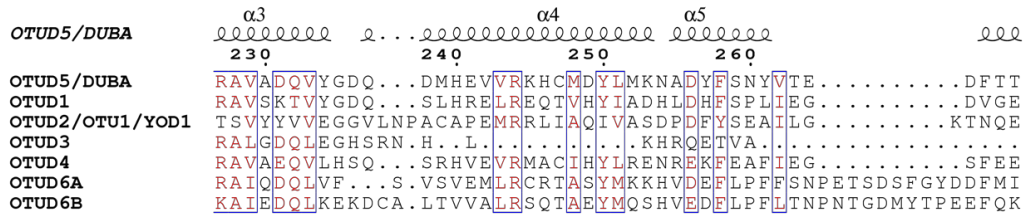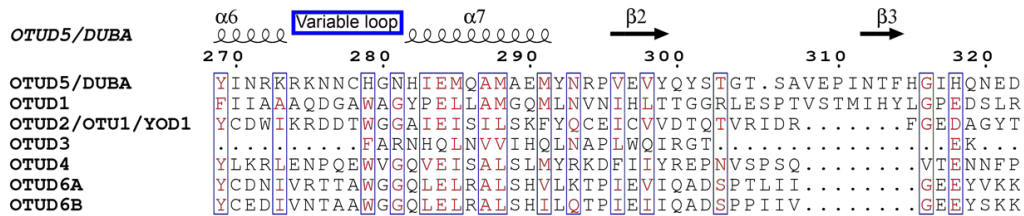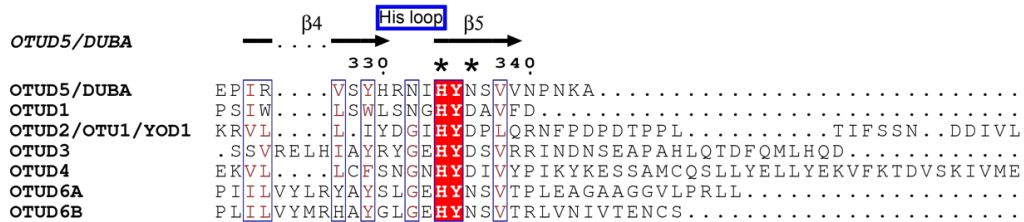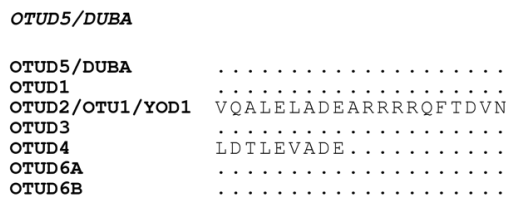

**Figure S7.** Alignment of amino acid sequences of the catalytic domains of OTU DUBs with small catalytic domains. The fully conserved residues are shaded in red. Blue box indicates residues displaying higher than 70% similarities. The asterisks indicate the catalytic residues. The secondary structure of OTUD5/DUBA from the crystal structure (PDB code: 3TMP) is displayed above the sequences. Sequence alignment was performed using Clustal Omega.<sup>2</sup> The sequence similarities and secondary structure were rendered with ESPrpt.<sup>3</sup>

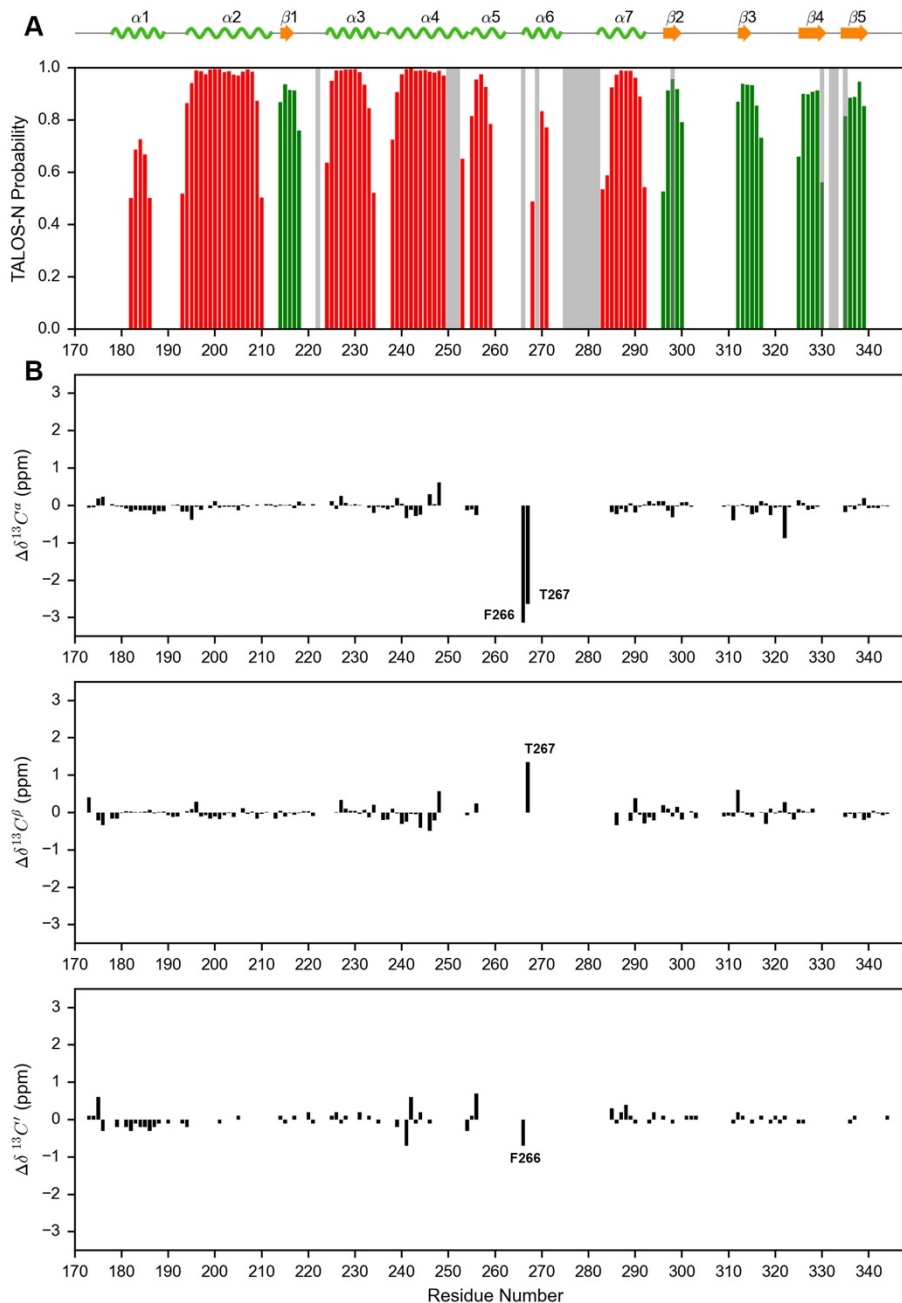

**Figure S8.** (A) Secondary structure of the R272E/K273E mutant predicted from  $^1\text{H}^{\text{N}}$ ,  $^{15}\text{N}$ ,  $^{13}\text{C}^{\alpha}$ ,  $^{13}\text{C}^{\beta}$  and  $^{13}\text{C}'$  by TALOS-N.<sup>4</sup> Alpha helices are represented by red bars and beta strands are represented by green bars. Invisible residues are shaded in grey. (B)  $^{13}\text{C}^{\alpha}$ ,  $^{13}\text{C}^{\beta}$  and  $^{13}\text{C}'$  chemical shift differences between the R272E/K273E mutant and the wild-type. The secondary structure derived from the crystal structure of p-DUBA conjugated to ubiquitin-aldehyde (PDB code: 3TMP) is displayed above the plots.

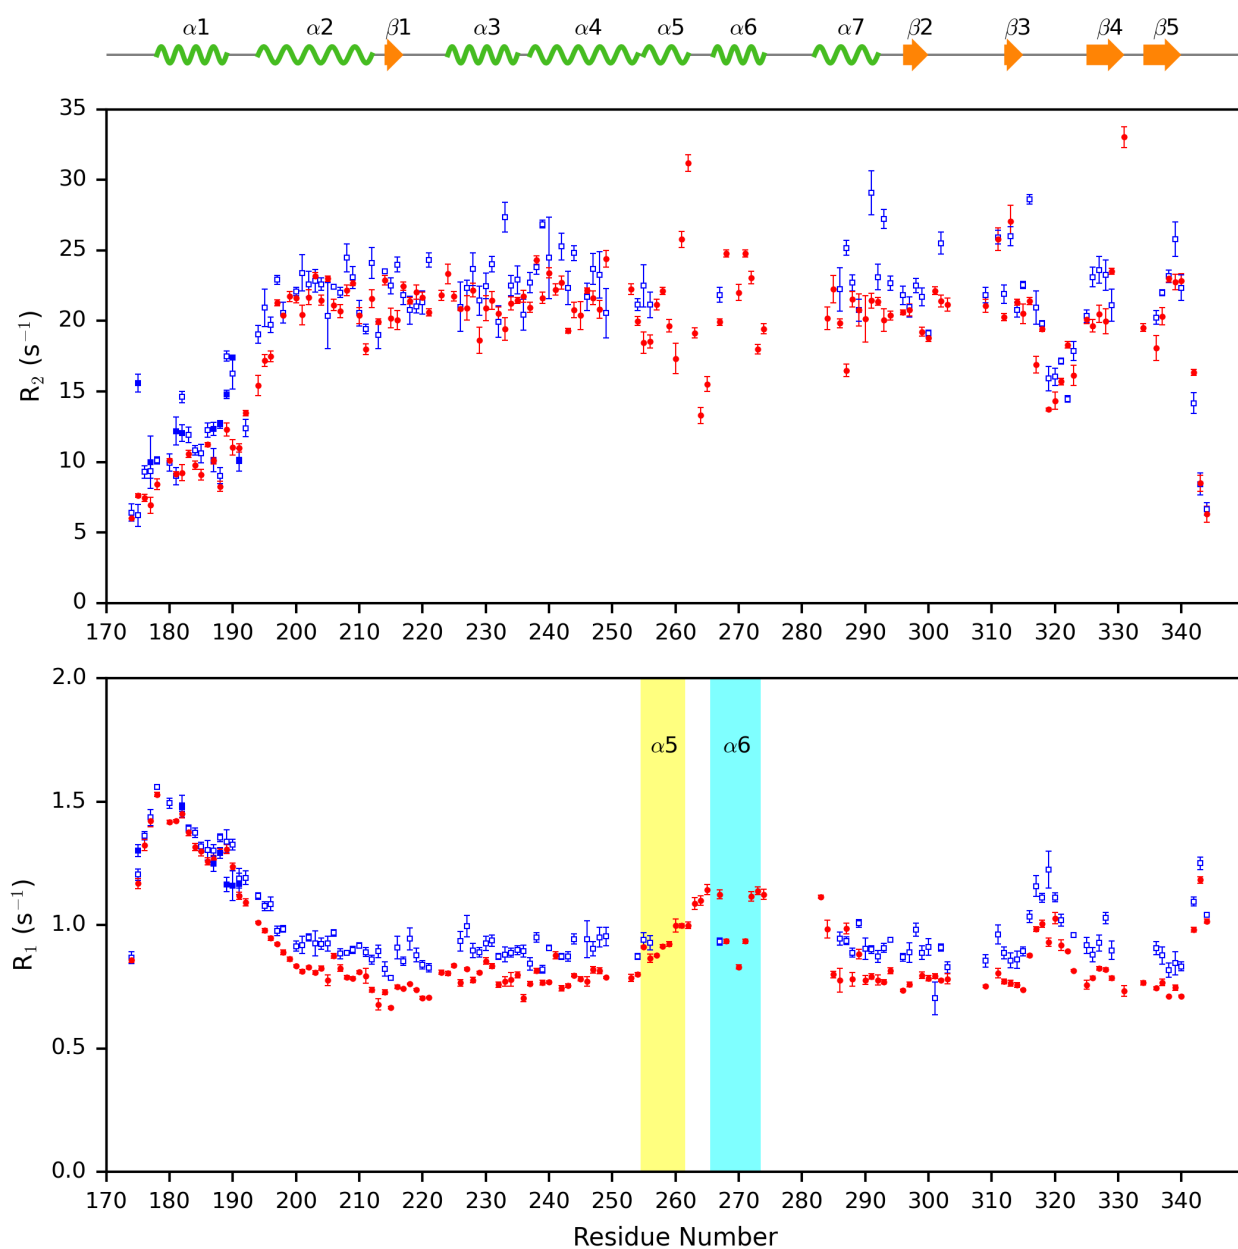

**Figure S9.** Comparison of  $^{15}\text{N}$   $R_1$  and  $R_2$  relaxation rates of wild-type p-DUBA (blue) and p-R272E/K273E mutant (red). The closed squares represent the **a** conformer and the open squares represent the **b** conformer or the only conformer in p-DUBA. The  $\alpha 5$  and  $\alpha 6$  helices were shaded in yellow and cyan, respectively, in the  $R_1$  plot. The secondary structure derived from the crystal structure of p-DUBA conjugated to ubiquitin-aldehyde (PDB code: 3TMP) is displayed above the plots. The data were acquired at 298 K and 700 MHz  $^1\text{H}$  frequency. The data on p-R272E/K273E were deposited into the BMRB under the accession code 50686.

Table S1. Group fits of  $R_2$  relaxation dispersion curves of p-DUBA

| Name  | $R_{ex}$ ( $s^{-1}$ ) | $\phi_{ex}^{1/2}$ (ppm) | Name | $R_{ex}$ ( $s^{-1}$ ) | $\phi_{ex}^{1/2}$ (ppm) | $k_{ex}$ ( $s^{-1}$ ) |
|-------|-----------------------|-------------------------|------|-----------------------|-------------------------|-----------------------|
| S177a | $21.6 \pm 0.4$        | $0.074 \pm 0.002$       | D238 | $3.1 \pm 0.4$         | $0.028 \pm 0.004$       | $4954 \pm 82$         |
| Y181b | $5.8 \pm 0.4$         | $0.039 \pm 0.003$       | H240 | $10.8 \pm 0.4$        | $0.053 \pm 0.002$       |                       |
| A183  | $1.7 \pm 0.4$         | $0.021 \pm 0.006$       | E241 | $58.7 \pm 0.5$        | $0.123 \pm 0.001$       |                       |
| A185  | $4.9 \pm 0.4$         | $0.035 \pm 0.003$       | V243 | $10.5 \pm 0.4$        | $0.052 \pm 0.002$       |                       |
| R187a | $2.7 \pm 0.4$         | $0.026 \pm 0.005$       | R244 | $4.1 \pm 0.4$         | $0.033 \pm 0.004$       |                       |
| R187b | $4.3 \pm 0.4$         | $0.033 \pm 0.004$       | H246 | $33.3 \pm 0.4$        | $0.092 \pm 0.001$       |                       |
| I188a | $2.6 \pm 0.4$         | $0.026 \pm 0.005$       | C247 | $5.9 \pm 0.4$         | $0.039 \pm 0.003$       |                       |
| I188b | $4.5 \pm 0.4$         | $0.034 \pm 0.003$       | M248 | $12.3 \pm 0.4$        | $0.056 \pm 0.002$       |                       |
| E189a | $1.5 \pm 0.4$         | $0.019 \pm 0.006$       | A255 | $39.4 \pm 0.4$        | $0.100 \pm 0.001$       |                       |
| E189b | $3.1 \pm 0.4$         | $0.028 \pm 0.004$       | D256 | $30.8 \pm 0.4$        | $0.089 \pm 0.002$       |                       |
| A190a | $7.6 \pm 0.4$         | $0.044 \pm 0.003$       | T267 | $10.5 \pm 0.4$        | $0.052 \pm 0.002$       |                       |
| A190b | $12.1 \pm 0.4$        | $0.056 \pm 0.002$       | Q286 | $12.6 \pm 0.4$        | $0.057 \pm 0.002$       |                       |
| M191a | $7.4 \pm 0.4$         | $0.044 \pm 0.003$       | M288 | $5.9 \pm 0.4$         | $0.039 \pm 0.003$       |                       |
| M191b | $12.3 \pm 0.4$        | $0.056 \pm 0.002$       | M291 | $6.6 \pm 0.4$         | $0.041 \pm 0.003$       |                       |
| D192  | $4.8 \pm 0.4$         | $0.035 \pm 0.003$       | Y292 | $16.2 \pm 0.4$        | $0.064 \pm 0.002$       |                       |
| V196  | $11.6 \pm 0.4$        | $0.055 \pm 0.002$       | N293 | $4.2 \pm 0.4$         | $0.033 \pm 0.004$       |                       |
| E197  | $2.0 \pm 0.4$         | $0.023 \pm 0.005$       | R294 | $6.7 \pm 0.4$         | $0.041 \pm 0.003$       |                       |
| Q198  | $4.8 \pm 0.4$         | $0.035 \pm 0.003$       | V296 | $2.8 \pm 0.4$         | $0.027 \pm 0.004$       |                       |
| E200  | $5.1 \pm 0.4$         | $0.036 \pm 0.003$       | E297 | $4.4 \pm 0.4$         | $0.033 \pm 0.004$       |                       |
| H201  | $5.9 \pm 0.4$         | $0.039 \pm 0.003$       | V298 | $15.8 \pm 0.4$        | $0.064 \pm 0.002$       |                       |
| W202  | $3.5 \pm 0.4$         | $0.030 \pm 0.004$       | Y299 | $2.1 \pm 0.4$         | $0.023 \pm 0.005$       |                       |
| F203  | $16.6 \pm 0.4$        | $0.065 \pm 0.002$       | Q300 | $19.1 \pm 0.4$        | $0.070 \pm 0.002$       |                       |
| E204  | $9.5 \pm 0.4$         | $0.049 \pm 0.002$       | Y301 | $43.7 \pm 0.5$        | $0.106 \pm 0.001$       |                       |
| A206  | $4.2 \pm 0.4$         | $0.033 \pm 0.004$       | S302 | $3.9 \pm 0.4$         | $0.032 \pm 0.004$       |                       |
| R208  | $6.7 \pm 0.4$         | $0.041 \pm 0.003$       | T303 | $21.9 \pm 0.4$        | $0.075 \pm 0.002$       |                       |
| K210  | $3.9 \pm 0.4$         | $0.031 \pm 0.004$       | E309 | $23.1 \pm 0.4$        | $0.077 \pm 0.002$       |                       |
| G212  | $2.6 \pm 0.4$         | $0.026 \pm 0.005$       | N312 | $4.3 \pm 0.4$         | $0.033 \pm 0.004$       |                       |
| F213  | $2.5 \pm 0.4$         | $0.025 \pm 0.005$       | H315 | $3.5 \pm 0.4$         | $0.030 \pm 0.004$       |                       |
| M218  | $5.8 \pm 0.4$         | $0.039 \pm 0.003$       | G316 | $3.7 \pm 0.4$         | $0.031 \pm 0.004$       |                       |
| K219  | $15.6 \pm 0.4$        | $0.063 \pm 0.002$       | I317 | $17.3 \pm 0.4$        | $0.067 \pm 0.002$       |                       |
| E220  | $3.4 \pm 0.4$         | $0.030 \pm 0.004$       | N320 | $1.5 \pm 0.4$         | $0.020 \pm 0.006$       |                       |
| D221  | $3.6 \pm 0.4$         | $0.030 \pm 0.004$       | R326 | $2.4 \pm 0.4$         | $0.025 \pm 0.005$       |                       |
| F226  | $10.2 \pm 0.4$        | $0.051 \pm 0.002$       | V327 | $25.7 \pm 0.4$        | $0.081 \pm 0.002$       |                       |
| R227  | $18.0 \pm 0.4$        | $0.068 \pm 0.002$       | S328 | $3.7 \pm 0.4$         | $0.031 \pm 0.004$       |                       |
| A228  | $8.9 \pm 0.4$         | $0.048 \pm 0.003$       | Y329 | $7.7 \pm 0.4$         | $0.044 \pm 0.003$       |                       |
| V229  | $5.4 \pm 0.4$         | $0.037 \pm 0.003$       | V339 | $6.5 \pm 0.4$         | $0.041 \pm 0.003$       |                       |
| V233  | $8.3 \pm 0.4$         | $0.046 \pm 0.003$       | N340 | $1.6 \pm 0.4$         | $0.020 \pm 0.006$       |                       |
| Y234  | $5.8 \pm 0.4$         | $0.039 \pm 0.003$       | N342 | $2.4 \pm 0.4$         | $0.025 \pm 0.005$       |                       |
| G235  | $7.4 \pm 0.4$         | $0.043 \pm 0.003$       |      |                       |                         |                       |
| D236  | $2.5 \pm 0.4$         | $0.026 \pm 0.005$       |      |                       |                         |                       |

Table S2. Group fits of  $R_2$  relaxation dispersion curves of np-DUBA

| Name | $R_{ex}$ ( $s^{-1}$ ) | $\phi_{ex}^{1/2}$ (ppm) | Name | $R_{ex}$ ( $s^{-1}$ ) | $\phi_{ex}^{1/2}$ (ppm) | $k_{ex}$ ( $s^{-1}$ ) |
|------|-----------------------|-------------------------|------|-----------------------|-------------------------|-----------------------|
| Y175 | $2.8 \pm 0.5$         | $0.029 \pm 0.005$       | M248 | $14.8 \pm 0.5$        | $0.066 \pm 0.002$       | $5750 \pm 110$        |
| E178 | $4.2 \pm 0.5$         | $0.035 \pm 0.004$       | D249 | $31.2 \pm 0.5$        | $0.096 \pm 0.002$       |                       |
| Y181 | $4.1 \pm 0.5$         | $0.035 \pm 0.004$       | A255 | $54.1 \pm 0.6$        | $0.127 \pm 0.002$       |                       |
| E182 | $1.5 \pm 0.5$         | $0.021 \pm 0.006$       | D256 | $35.0 \pm 0.5$        | $0.102 \pm 0.002$       |                       |
| A183 | $1.3 \pm 0.5$         | $0.020 \pm 0.007$       | T267 | $7.3 \pm 0.5$         | $0.047 \pm 0.003$       |                       |
| A185 | $4.7 \pm 0.5$         | $0.038 \pm 0.004$       | M288 | $7.0 \pm 0.5$         | $0.046 \pm 0.003$       |                       |
| R187 | $8.2 \pm 0.5$         | $0.049 \pm 0.003$       | E290 | $12.5 \pm 0.5$        | $0.061 \pm 0.002$       |                       |
| I188 | $5.8 \pm 0.5$         | $0.042 \pm 0.003$       | Y292 | $20.0 \pm 0.5$        | $0.077 \pm 0.002$       |                       |
| A190 | $20.1 \pm 0.5$        | $0.077 \pm 0.002$       | N293 | $3.8 \pm 0.5$         | $0.034 \pm 0.004$       |                       |
| M191 | $23.3 \pm 0.5$        | $0.083 \pm 0.002$       | R294 | $5.3 \pm 0.5$         | $0.040 \pm 0.003$       |                       |
| D192 | $1.8 \pm 0.5$         | $0.023 \pm 0.006$       | V296 | $3.5 \pm 0.5$         | $0.032 \pm 0.004$       |                       |
| T195 | $3.8 \pm 0.5$         | $0.033 \pm 0.004$       | V298 | $15.0 \pm 0.5$        | $0.067 \pm 0.002$       |                       |
| V196 | $9.0 \pm 0.5$         | $0.052 \pm 0.003$       | Q300 | $15.9 \pm 0.5$        | $0.069 \pm 0.002$       |                       |
| E197 | $4.7 \pm 0.5$         | $0.037 \pm 0.004$       | S302 | $2.8 \pm 0.5$         | $0.029 \pm 0.005$       |                       |
| Q198 | $6.0 \pm 0.5$         | $0.042 \pm 0.003$       | E309 | $15.7 \pm 0.5$        | $0.068 \pm 0.002$       |                       |
| E200 | $11.7 \pm 0.5$        | $0.059 \pm 0.002$       | N312 | $4.5 \pm 0.5$         | $0.037 \pm 0.004$       |                       |
| H201 | $3.6 \pm 0.5$         | $0.033 \pm 0.004$       | T313 | $4.6 \pm 0.5$         | $0.037 \pm 0.004$       |                       |
| F203 | $18.8 \pm 0.5$        | $0.075 \pm 0.002$       | F314 | $3.9 \pm 0.5$         | $0.034 \pm 0.004$       |                       |
| E204 | $8.7 \pm 0.5$         | $0.051 \pm 0.003$       | H315 | $3.6 \pm 0.5$         | $0.033 \pm 0.004$       |                       |
| K205 | $21.7 \pm 0.5$        | $0.081 \pm 0.002$       | G316 | $4.4 \pm 0.5$         | $0.036 \pm 0.004$       |                       |
| A206 | $4.4 \pm 0.5$         | $0.036 \pm 0.004$       | I317 | $20.3 \pm 0.5$        | $0.078 \pm 0.002$       |                       |
| R208 | $7.7 \pm 0.5$         | $0.048 \pm 0.003$       | V327 | $22.8 \pm 0.5$        | $0.082 \pm 0.002$       |                       |
| K210 | $3.0 \pm 0.5$         | $0.030 \pm 0.004$       | S328 | $4.0 \pm 0.5$         | $0.034 \pm 0.004$       |                       |
| I215 | $1.9 \pm 0.5$         | $0.024 \pm 0.006$       | Y329 | $7.8 \pm 0.5$         | $0.048 \pm 0.003$       |                       |
| M218 | $4.4 \pm 0.5$         | $0.036 \pm 0.004$       | V339 | $6.5 \pm 0.5$         | $0.044 \pm 0.003$       |                       |
| K219 | $19.4 \pm 0.5$        | $0.076 \pm 0.002$       | N340 | $2.0 \pm 0.5$         | $0.024 \pm 0.006$       |                       |
| E220 | $3.2 \pm 0.5$         | $0.031 \pm 0.004$       | N342 | $3.1 \pm 0.5$         | $0.031 \pm 0.004$       |                       |
| F226 | $10.7 \pm 0.5$        | $0.056 \pm 0.002$       |      |                       |                         |                       |
| R227 | $14.3 \pm 0.5$        | $0.065 \pm 0.002$       |      |                       |                         |                       |
| A228 | $9.2 \pm 0.5$         | $0.052 \pm 0.003$       |      |                       |                         |                       |
| V229 | $6.9 \pm 0.5$         | $0.045 \pm 0.003$       |      |                       |                         |                       |
| V233 | $8.0 \pm 0.5$         | $0.049 \pm 0.003$       |      |                       |                         |                       |
| Y234 | $7.1 \pm 0.5$         | $0.046 \pm 0.003$       |      |                       |                         |                       |
| G235 | $8.9 \pm 0.5$         | $0.051 \pm 0.003$       |      |                       |                         |                       |
| H240 | $7.4 \pm 0.5$         | $0.047 \pm 0.003$       |      |                       |                         |                       |
| V243 | $9.4 \pm 0.5$         | $0.053 \pm 0.003$       |      |                       |                         |                       |
| H246 | $25.3 \pm 0.5$        | $0.087 \pm 0.002$       |      |                       |                         |                       |

Table S3. Individual fits of  $R_2$  relaxation dispersion curves of p-R272E/K273E\*

| Name | $k_{ex}$ ( $s^{-1}$ ) | $R_{ex}$ ( $s^{-1}$ ) | $\phi_{ex}^{1/2}$ (ppm) | Name | $k_{ex}$ ( $s^{-1}$ ) | $R_{ex}$ ( $s^{-1}$ ) | $\phi_{ex}^{1/2}$ (ppm) |
|------|-----------------------|-----------------------|-------------------------|------|-----------------------|-----------------------|-------------------------|
| A190 | 7700± 920             | 1.74±0.07             | 0.026±0.002             | T263 | 18700±2400            | 13± 1                 | 0.11±0.01               |
| T195 | 1790± 600             | 1.31±0.04             | 0.011±0.001             | D265 | 7590± 600             | 2.64±0.07             | 0.032±0.001             |
| V196 | 10800±1500            | 3.1±0.2               | 0.041±0.004             | T267 | 20000±3300            | 14± 2                 | 0.12±0.02               |
| E197 | 3500±1100             | 1.61±0.09             | 0.017±0.002             | T268 | 15200±3800            | 5.9±0.9               | 0.07±0.01               |
| Q198 | 5600±1800             | 1.00±0.09             | 0.017±0.003             | E272 | 17400±4700            | 6± 1                  | 0.07±0.02               |
| E200 | 7900±1300             | 1.44±0.08             | 0.024±0.002             | I283 | 14200±2100            | 7.2±0.6               | 0.072±0.008             |
| W202 | 4070± 840             | 2.4±0.1               | 0.023±0.002             | M285 | 14700±4100            | 5.0±0.8               | 0.06±0.01               |
| F203 | 7490± 770             | 11.1±0.4              | 0.066±0.004             | Q286 | 18600±6400            | 27± 6                 | 0.16±0.04               |
| E204 | 9290± 850             | 3.4±0.1               | 0.040±0.002             | Y292 | 2160± 630             | 3.2±0.1               | 0.019±0.002             |
| K205 | 5830± 270             | 11.8±0.2              | 0.060±0.001             | R294 | 6200±1500             | 1.9±0.1               | 0.025±0.003             |
| A206 | 4080± 950             | 2.0±0.1               | 0.020±0.002             | V296 | 14100±2400            | 6.9±0.7               | 0.071±0.009             |
| L207 | 7600±1200             | 4.0±0.2               | 0.039±0.004             | Q300 | 6670± 570             | 2.68±0.07             | 0.030±0.001             |
| R208 | 4980± 940             | 2.9±0.1               | 0.027±0.002             | Y301 | 10260± 810            | 21.0±0.7              | 0.106±0.005             |
| K210 | 7500±2300             | 1.6±0.2               | 0.025±0.004             | S302 | 4570± 990             | 2.2±0.1               | 0.023±0.002             |
| K211 | 3030± 950             | 3.7±0.2               | 0.024±0.003             | E309 | 5760± 700             | 2.6±0.09              | 0.028±0.002             |
| F213 | 5800±1700             | 1.6±0.1               | 0.022±0.003             | I311 | 9900±1200             | 7.6±0.4               | 0.062±0.005             |
| I215 | 7200±1200             | 1.69±0.09             | 0.025±0.002             | N312 | 7400±1400             | 2.8±0.2               | 0.033±0.003             |
| K219 | 12900±2500            | 2.2±0.2               | 0.038±0.005             | H315 | 10440± 920            | 1.02±0.04             | 0.024±0.001             |
| E220 | 8900±1500             | 1.34±0.09             | 0.025±0.002             | G316 | 18200±2000            | 5.8±0.4               | 0.074±0.007             |
| D221 | 6900±2200             | 1.1±0.1               | 0.020±0.003             | I317 | 7210± 900             | 3.5±0.1               | 0.036±0.002             |
| A223 | 6000±1700             | 1.9±0.2               | 0.024±0.003             | E323 | 9800±1600             | 1.01±0.07             | 0.023±0.002             |
| C224 | 8500±1900             | 3.2±0.3               | 0.038±0.005             | S328 | 6000±1400             | 2.0±0.1               | 0.025±0.003             |
| L225 | 15200±3300            | 4.4±0.6               | 0.059±0.009             | Y329 | 5880± 290             | 12.4±0.2              | 0.061±0.002             |
| F226 | 12300±4100            | 3.5±0.6               | 0.05±0.01               | R331 | 7880± 890             | 38± 2                 | 0.125±0.008             |
| R227 | 14100±3000            | 4.5±0.5               | 0.057±0.009             | N336 | 6300±1400             | 1.9±0.1               | 0.025±0.003             |
| D231 | 7500±2400             | 1.9±0.2               | 0.027±0.005             | S337 | 8500±2600             | 1.6±0.2               | 0.026±0.005             |
| Y234 | 3990± 670             | 5.0±0.2               | 0.032±0.002             |      |                       |                       |                         |
| D238 | 6400±1600             | 2.0±0.2               | 0.026±0.003             |      |                       |                       |                         |
| M239 | 8900±2200             | 2.1±0.2               | 0.031±0.004             |      |                       |                       |                         |
| H246 | 4600±1500             | 1.7±0.1               | 0.02±0.003              |      |                       |                       |                         |
| C247 | 7800±2700             | 1.4±0.2               | 0.024±0.005             |      |                       |                       |                         |
| N254 | 6100±1200             | 2.1±0.1               | 0.026±0.003             |      |                       |                       |                         |
| A255 | 13000±1900            | 8.6±0.7               | 0.076±0.008             |      |                       |                       |                         |
| Y257 | 9500±1400             | 3.1±0.2               | 0.039±0.004             |      |                       |                       |                         |
| F258 | 5470± 850             | 3.4±0.1               | 0.031±0.002             |      |                       |                       |                         |
| S259 | 9200±1100             | 4.4±0.2               | 0.046±0.003             |      |                       |                       |                         |
| N260 | 13700±2900            | 11± 1                 | 0.09±0.01               |      |                       |                       |                         |
| Y261 | 12000±2500            | 4.0±0.4               | 0.05±0.007              |      |                       |                       |                         |
| V262 | 7960 ±960             | 6.5±0.3               | 0.052±0.004             |      |                       |                       |                         |

\* Only residues that display <35% uncertainty in  $k_{ex}$  and  $R_{ex} > 1.0 s^{-1}$  are shown.

**References:**

- [1] Wiener, R., Zhang, X., Wang, T., and Wolberger, C. (2012) The mechanism of OTUB1-mediated inhibition of ubiquitination, *Nature* 483, 618-622.
- [2] Madeira, F., Park, Y. M., Lee, J., Buso, N., Gur, T., Madhusoodanan, N., Basutkar, P., Tivey, A. R. N., Potter, S. C., Finn, R. D., and Lopez, R. (2019) The EMBL-EBI search and sequence analysis tools APIs in 2019, *Nucleic Acids Res.* 47, W636-W641.
- [3] Robert, X., and Gouet, P. (2014) Deciphering key features in protein structures with the new ENDscript server, *Nucleic Acids Res.* 42, W320-324.
- [4] Shen, Y., and Bax, A. (2013) Protein backbone and sidechain torsion angles predicted from NMR chemical shifts using artificial neural networks, *J. Biomol. NMR* 56, 227-241.
